# Supplementary material
Source: PubMed Central journal article supplement (PMC10487267)
Supplement: NIHMS1920177-supplement-1.pdf [file NIHMS1920177-supplement-1.pdf]

**Supplemental Table 1: Incidence rate (per 100,000 person-years) of specific pneumococcal serotypes, among the subset of 169 patients with serotypes available.**

| Serotype                                                     |                                                       | Pre-PCV13, 2002-2010 |                | Post-PCV13, 2011-2018 |                | <i>p</i> -value |
|--------------------------------------------------------------|-------------------------------------------------------|----------------------|----------------|-----------------------|----------------|-----------------|
|                                                              |                                                       | Number of cases      | Rate (95% CI)  | Number of cases       | Rate (95% CI)  |                 |
| 4, 6B, 9V, or 19F (part of PCV7, PCV13 and PPSV23 serotypes) |                                                       |                      |                |                       |                |                 |
|                                                              | Overall, rates are age- and sex-adjusted <sup>b</sup> | 13                   | 1.2 (0.5, 1.9) | 0                     |                |                 |
|                                                              | By age group (years)                                  |                      |                |                       |                |                 |
|                                                              | <19                                                   | 1                    | 0.3 (0, 1.8)   | 0                     |                |                 |
|                                                              | 19-64                                                 | 8                    | 1.1 (0.5, 2.2) | 0                     |                |                 |
|                                                              | 65+                                                   | 4                    | 3.1 (0.9, 8.1) | 0                     |                |                 |
| 1, 3, 6A, 7F or 19A (part of PCV13/non-PCV7 serotypes)       |                                                       |                      |                |                       |                |                 |
|                                                              | Overall, rates are age- and sex-adjusted <sup>b</sup> | 40                   | 3.7 (2.6, 4.9) | 10                    | 0.8 (0.3, 1.2) | <.001           |
|                                                              | By age group (years)                                  |                      |                |                       |                |                 |
|                                                              | <19                                                   | 5                    | 1.6 (0.5, 3.8) | 2                     | 0.6 (0.1, 2.2) | .24             |
|                                                              | 19-64                                                 | 17                   | 2.4 (1.4, 3.9) | 1                     | 0.1 (0, 0.7)   | <.001           |

|                                                                                                         |                                                       |    |                  |    |                  |      |
|---------------------------------------------------------------------------------------------------------|-------------------------------------------------------|----|------------------|----|------------------|------|
|                                                                                                         | 65+                                                   | 18 | 14.2 (8.4, 22.4) | 7  | 4.1 (1.6, 8.4)   | .011 |
| 8, 9N, 9V, 10A, 11A, 12F, 14, 15B, 17F, 18C, 19A, 19F, 20, 22F, 23F, and 33F (part of PPSV23/non-PCV13) |                                                       |    |                  |    |                  |      |
|                                                                                                         | Overall, rates are age- and sex-adjusted <sup>b</sup> | 26 | 2.4 (1.5, 3.4)   | 35 | 2.7 (1.8, 3.6)   | .39  |
|                                                                                                         | By age group (years)                                  |    |                  |    |                  |      |
|                                                                                                         | <19                                                   | 4  | 1.3 (0.4, 3.3)   | 3  | 0.9 (0.2, 2.7)   | .69  |
|                                                                                                         | 19-64                                                 | 12 | 1.7 (0.9, 3.0)   | 12 | 1.6 (0.8, 2.8)   | .94  |
|                                                                                                         | 65+                                                   | 10 | 7.9 (3.8, 14.5)  | 20 | 11.7 (7.2, 18.1) | .13  |
| Non-vaccine serotypes <sup>c</sup>                                                                      |                                                       |    |                  |    |                  |      |
|                                                                                                         | Overall, rates are age- and sex-adjusted <sup>b</sup> | 26 | 2.5 (1.5, 3.5)   | 19 | 1.5 (0.8, 2.2)   | .18  |
|                                                                                                         | By age group (years)                                  |    |                  |    |                  |      |
|                                                                                                         | <19                                                   | 4  | 1.3 (0.4, 3.3)   | 3  | 0.9 (0.2, 2.7)   | .69  |
|                                                                                                         | 19-64                                                 | 7  | 1.0 (0.4, 2.1)   | 5  | 0.7 (0.2, 1.5)   | .53  |
|                                                                                                         | 65+                                                   | 15 | 11.8 (6.6, 19.5) | 11 | 6.4 (3.2, 11.5)  | .27  |

<sup>a</sup> Abbreviation: CI, confidence interval; IPD, invasive pneumococcal disease; PCV7, 7-valent pneumococcal conjugate vaccine; PCV13, 13-valent pneumococcal conjugate vaccine; PPSV23, 23-valent pneumococcal polysaccharide vaccine.

<sup>b</sup> Adjusted to the population structure of the U.S. total population in 2010.

<sup>c</sup> The types of non-vaccine serotypes (and number of patients in each period) are as follows: 6C (0 pre, 1 post), 7C (2 pre, 1 post), 15A (5 pre, 1 post), 16F (3 pre, 2 post), 21 (0 pre, 1 post), 23A (5 pre, 1 post), 23B (0 pre, 5 post), 24A (0 pre, 1 post), 31 (3 pre, 2 post), 34 (1 pre, 0 post), 35B (3 pre, 4 post), and 35F (4 pre, 0 post)

**Supplemental Table 2: Serotype and vaccine status, overall and by calendar period of IPD diagnosis.**

| <b>Category</b>                                                                         | <b>Pre-PCV13<br/>(2002-2010,<br/>N=115)</b> | <b>Post-PCV13<br/>(2011-2018,<br/>N=72)</b> | <b>Overall<br/>(N=187)</b> |
|-----------------------------------------------------------------------------------------|---------------------------------------------|---------------------------------------------|----------------------------|
| <b>Excluded from the analysis for this table</b>                                        | N=61                                        | N=24                                        | N=85                       |
| Did not receive relevant vaccines and the serotype was not available                    | 5                                           | 3                                           | 8                          |
| Did not receive relevant vaccines, but the serotype was available                       | 51                                          | 16                                          | 67                         |
| Received relevant vaccines, but the serotype was not available                          | 5                                           | 5                                           | 10                         |
| <b>Included</b>                                                                         | N (% of 54)                                 | N (% of 48)                                 | N (% of 102)               |
| Received either PCV7 or PCV13 and developed IPD from PCV7 or PCV13 serotypes            | 2 (3.7%)                                    | 1 (2.1%)                                    | 3 (2.9%)                   |
| Received PPSV23 vaccine and developed IPD from PPSV23 serotypes                         | 25 (46.3%)                                  | 21 (43.8%)                                  | 46 (45.1%)                 |
| Received PCV7 or PCV13 along with PPSV23 and developed IPD from PPSV23 serotypes        | 0 (0%)                                      | 5 (10.4%)                                   | 5 (4.9%)                   |
| Received PCV7 or PCV13 along with PPSV23 and developed IPD from PCV7 or PCV13 serotypes | 0 (0%)                                      | 1 (2.1%)                                    | 1 (1.0%)                   |

|                                                                                                         |            |            |            |
|---------------------------------------------------------------------------------------------------------|------------|------------|------------|
| Received vaccines (either PCV7 or PCV13 or PPSV23), but non-vaccine serotypes were recovered            | 19 (35.2%) | 17 (35.4%) | 36 (35.3%) |
| Received vaccines (either PCV7 or PCV13 or PPSV23), but developed IPD from a different vaccine serotype | 8 (14.8%)  | 3 (6.2%)   | 11 (10.8%) |

---

<sup>a</sup> Abbreviation: IPD, invasive pneumococcal disease; N, number; PCV7, 7-valent pneumococcal conjugate vaccine; PCV13, 13-valent pneumococcal conjugate vaccine; PPSV23, 23-valent pneumococcal polysaccharide vaccine.
